# Supplementary material for: Circulating Lactonase Activity but Not Protein Level of PON-1 Predicts Adverse Outcomes in Subjects with Chronic Kidney Disease
Source: PubMed Central journal article supplement (PMC6678354; doi:10.3390/jcm8071034), 2019-07-15
Supplement: jcm-08-01034-s001.pdf [file jcm-08-01034-s001.pdf]

Chrysan J. Mohammed

Circulating Lactonase Activity but not Protein Level of PON-1 Predicts Adverse Outcomes in Subjects with Chronic Kidney Disease

Supplementary Data

**Table S1.** Clinical characteristics among participants in the CRISIS clinical trial stratified by CKD etiology.

|                                                   | <b>DM<br/>(n = 40)</b> | <b>APKD<br/>(n = 16)</b> | <b>Vascular/HTN<br/>(n = 85)</b> | <b>GN/Vasculitis<br/>(n = 33)</b> | <b>Pyelonephritis<br/>(n = 16)</b> | <b>Other<br/>(n = 58)</b> | <b>p-<br/>value</b> |
|---------------------------------------------------|------------------------|--------------------------|----------------------------------|-----------------------------------|------------------------------------|---------------------------|---------------------|
| Age (yr)                                          | 68 ± 10                | 57 ± 15                  | 72 ± 10                          | 58 ± 15                           | 49 ± 20                            | 66 ± 14                   | <0.0001             |
| Male                                              | 26 (65%)               | 3 (19%)                  | 57 (67%)                         | 21 (64%)                          | 4 (25%)                            | 39 (67%)                  | 0.003               |
| White                                             | 40 (100%)              | 16 (100%)                | 85 (100%)                        | 33 (100%)                         | 16 (100%)                          | 58 (100%)                 | -                   |
| Hispanic/Latino                                   | 0 (0%)                 | 0 (0%)                   | 0 (0%)                           | 0 (0%)                            | 0 (0%)                             | 0 (0%)                    | -                   |
| Height (in)                                       | 67 ± 3.5               | 65 ± 3.3                 | 66 ± 3.6                         | 68 ± 4.0                          | 65 ± 4.0                           | 67 ± 3.1                  | 0.11                |
| Weight (lb)                                       | 193 ± 34.2             | 156 ± 24.2               | 173 ± 36.5                       | 171 ± 40.6                        | 183 ± 45.6                         | 177 ± 33.6                | 0.02                |
| BMI (kg/m <sup>2</sup> )                          | 30.0 ± 5.0             | 26.6 ± 5.0               | 27.6 ± 5.6                       | 26.7 ± 5.1                        | 30.1 ± 7.7                         | 28 ± 4.4                  | 0.06                |
| Systolic BP (mmHg)                                | 135 ± 22               | 130 ± 18                 | 141 ± 20                         | 138 ± 19                          | 127 ± 17                           | 136 ± 20                  | 0.09                |
| Diastolic BP (mmHg)                               | 68 ± 12                | 77 ± 13                  | 72 ± 12                          | 75 ± 10                           | 77 ± 9                             | 76 ± 12                   | 0.004               |
| Urine Protein (mg/dL)                             | 62 ± 133               | 21 ± 32                  | 50 ± 98                          | 118 ± 168                         | 35 ± 29                            | 44 ± 66                   | 0.01                |
| Creatinine (mg/dL)                                | 2.9 ± 1.6              | 2.7 ± 1.3                | 2.6 ± 1.5                        | 2.9 ± 1.5                         | 2.1 ± 0.7                          | 3.0 ± 2.1                 | 0.35                |
| CKD-EPI-eGFR (ml/min<br>per 1.73 m <sup>2</sup> ) | 27.8 ± 13.1            | 34 ± 18.5                | 32 ± 17.0                        | 31 ± 20.0                         | 40 ± 15.0                          | 33 ± 23.2                 | 0.32                |
| <b>Paraoxonase</b>                                |                        |                          |                                  |                                   |                                    |                           |                     |
| Activity (pmol/min/mL)                            | 2032.5 ± 563.9         | 1941.3 ±<br>516.0        | 2159.6 ± 738.0                   | 2313.3 ± 533.2                    | 2127.2 ± 393.6                     | 2190.1 ±<br>746.8         | 0.41                |
| Log Activity<br>(pmol/min/mL)                     | 7.6 ± 0.29             | 7.5 ± 0.29               | 7.6 ± 0.6                        | 7.7 ± 0.24                        | 7.6 ± 0.19                         | 7.6 ± 0.39                | 0.63                |
| Median Activity (High)                            | 15 (39%)               | 5 (31%)                  | 44 (52%)                         | 21 (64%)                          | 9 (56%)                            | 29 (50%)                  | 0.23                |
| Median Activity (Low )                            | 23 (61%)               | 11 (69%)                 | 41 (48%)                         | 12 (36%)                          | 7 (44%)                            | 29 (50%)                  | -                   |
| Protein (ng/mL)                                   | 280.4 ± 294.6          | 427.1 ± 303.8            | 436.9 ± 307.5                    | 412.8 ± 213.7                     | 430.9 ± 312.5                      | 480 ± 396.3               | 0.08                |
| Log Protein (ng/mL)                               | 5.3 ± 0.70             | 5.8 ± 0.71               | 5.9 ± 0.65                       | 5.9 ± 0.50                        | 5.9 ± 0.58                         | 6.0 ± 0.59                | <0.0001             |
| Median Protein (High)                             | 8 (20%)                | 8 (50%)                  | 46 (55%)                         | 20 (61%)                          | 8 (50%)                            | 32 (56%)                  | 0.002               |
| Median Protein (low)                              | 32 (80%)               | 8 (50%)                  | 38 (45%)                         | 13 (39%)                          | 8 (50%)                            | 25 (44%)                  | -                   |
| Adjusted† PON Activity                            | 11.4 ± 5.6             | 5.5 ± 2.8                | 6.9 ± 5.4                        | 6.6 ± 2.8                         | 6.2 ± 2.7                          | 6.9 ± 4.4                 | <0.0001             |
| Log Adjusted† PON<br>Activity                     | 2.3 ± 0.64             | 1.6 ± 0.61               | 1.7 ± 0.77                       | 1.8 ± 0.45                        | 1.7 ± 0.54                         | 1.7 ± 0.64                | 0.0004              |

Chrysan J. Mohammed

Circulating Lactonase Activity but not Protein Level of PON-1 Predicts Adverse Outcomes in Subjects with Chronic Kidney Disease

**Supplementary Data**

|                                 |          |          |          |          |          |          |         |
|---------------------------------|----------|----------|----------|----------|----------|----------|---------|
| Median Adjusted Activity (High) | 31 (82%) | 7 (44%)  | 36 (43%) | 17 (52%) | 9 (56%)  | 22 (39%) | 0.001   |
| Median Adjusted Activity (Low)  | 7 (18%)  | 9 (56%)  | 48 (57%) | 16 (48%) | 7 (44%)  | 35 (61%) | -       |
| <b>CKD Stage</b>                |          |          |          |          |          |          |         |
| Mild                            | 0 (0%)   | 1 (6%)   | 2 (2%)   | 2 (6%)   | 0 (0%)   | 4 (7%)   |         |
| Moderate                        | 15 (38%) | 5 (31%)  | 39 (46%) | 12 (36%) | 8 (50%)  | 24 (41%) |         |
| Severe                          | 15 (37%) | 6 (38%)  | 31 (36%) | 12 (36%) | 7 (44%)  | 14 (24%) |         |
| ESKD                            | 10 (25%) | 4 (25%)  | 13 (15%) | 7 (21%)  | 1 (6%)   | 16 (28%) |         |
| <b>Risk Factors/Indications</b> |          |          |          |          |          |          |         |
| Myocardial Infarction           | 6 (15%)  | 0 (0%)   | 25 (29%) | 1 (3%)   | 0 (0%)   | 9 (15%)  | <0.001  |
| Angina                          | 9 (22%)  | 2 (12%)  | 25 (29%) | 0 (0%)   | 2 (12%)  | 11 (19%) | 0.001   |
| CVA                             | 1 (3%)   | 1 (6%)   | 8 (9%)   | 1 (3%)   | 2 (12%)  | 5 (9%)   | 0.79    |
| TIA                             | 1 (2%)   | 1 (6%)   | 11 (13%) | 0        | 2 (12%)  | 6 (10%)  | 0.06    |
| Diabetes Mellitus               | 36 (98%) | 1 (6%)   | 21 (25%) | 2 (6%)   | 3 (19%)  | 13 (22%) | <0.0001 |
| Peripheral Vascular disease     | 9 (23%)  | 1 (6%)   | 21 (25%) | 1 (3%)   | 2 (12%)  | 11 (19%) | 0.03    |
| Smoking (current)               | 4 (10%)  | 2 (12%)  | 8 (9%)   | 7 (21%)  | 0 (0%)   | 10 (17%) | 0.14    |
| Smoking History                 | 29 (73%) | 7 (44%)  | 65 (76%) | 23 (70%) | 6 (37%)  | 41 (71%) | 0.02    |
| <b>Medication Use</b>           |          |          |          |          |          |          |         |
| ACE                             | 18 (45%) | 8 (50%)  | 28 (33%) | 13 (40%) | 9 (56%)  | 20 (34%) | 0.40    |
| ARB                             | 15 (37%) | 4 (25%)  | 18 (21%) | 12 (36%) | 3 (19%)  | 9 (15%)  | 0.10    |
| ACE/ARB                         | 29 (72%) | 12 (75%) | 45 (53%) | 23 (70%) | 12 (75%) | 28 (48%) | 0.04    |
| β-Blocker                       | 9 (22%)  | 6 (37%)  | 35 (41%) | 8 (24%)  | 4 (25%)  | 12 (21%) | 0.09    |
| Diuretic                        | 26 (65%) | 4 (25%)  | 47 (55%) | 14 (42%) | 4 (25%)  | 18 (31%) | 0.001   |
| Statin                          | 27 (67%) | 6 (27%)  | 55 (65%) | 22 (67%) | 3 (19%)  | 27 (47%) | 0.001   |
| Aspirin                         | 24 (60%) | 4 (25%)  | 45 (53%) | 3 (9%)   | 3 (19%)  | 25 (43%) | <0.0001 |
| <b>Endpoints</b>                |          |          |          |          |          |          |         |
| Composite*                      | 28 (70%) | 14 (87%) | 59 (69%) | 24 (73%) | 5 (31%)  | 36 (60%) | 0.02    |
| Mortality                       | 23 (57%) | 6 (37%)  | 50 (59%) | 14 (42%) | 2 (12%)  | 31 (53%) | 0.008   |
| RRT                             | 9 (22%)  | 10 (62%) | 13 (15%) | 16 (48%) | 3 (19%)  | 15 (26%) | 0.003   |

Chrysan J. Mohammed

Circulating Lactonase Activity but not Protein Level of PON-1 Predicts Adverse Outcomes in Subjects with Chronic Kidney Disease

Supplementary Data

MACE\*\* 4 (10%) 2 (12%) 10 (12%) 0 (0%) 2 (12%) 5 (9%) 0.19

Values are expressed as mean  $\pm$  SD. DM indicates diabetic nephropathy; APKD: adult polycystic kidney disease; vascular/HTN: vascular hypertension; BP: blood pressure; CKD-EC-eGFR: chronic kidney disease-epidemiology collaboration-eGFR; ESKD: end-stage kidney disease; CVA: cerebral vascular accident; TIA: transient ischemic accident; ACE: angiotensin converting enzyme; ARB: angiotensin II receptor blocker. \* Composite endpoint indicates the first occurrence of any of the following events: mortality (cardiovascular or renal death), MACE (myocardial infarction, congestive heart failure, or stroke), and renal replacement therapy. \*\*MACE indicates major adverse cardiovascular event comprising either myocardial infarction, congestive heart failure, or stroke.

**Table S2.** Clinical characteristics among non-CKD healthy controls

|                                                                        | N (%)    | Mean $\pm$ SD      |
|------------------------------------------------------------------------|----------|--------------------|
| Age (yr)                                                               |          | 30 $\pm$ 10        |
| Male                                                                   | 15 (45%) |                    |
| White                                                                  | 26 (81%) |                    |
| Black                                                                  | 1 (3%)   |                    |
| Asian                                                                  | 3 (9%)   |                    |
| Other                                                                  | 2 (6%)   |                    |
| Height (m)                                                             |          | 1.7 $\pm$ 1.0      |
| Weight (kg)                                                            |          | 80 $\pm$ 19        |
| BMI (kg/m <sup>2</sup> )                                               |          | 28.5 $\pm$ 7.0     |
| Systolic Blood Pressure (mmHg)                                         |          | 117 $\pm$ 10       |
| Diastolic Blood Pressure (mmHg)                                        |          | 74 $\pm$ 7         |
| Creatinine (mg/dL)                                                     |          | 0.89 $\pm$ 0.21    |
| CKD- Epidemiology Collaboration-eGFR (ml/min per 1.73 m <sup>2</sup> ) |          | 102.7 $\pm$ 16.9   |
| <b>Paraoxonase</b>                                                     |          |                    |
| PON Lactonase Activity (pmol/min/mL)                                   |          | 3514.9 $\pm$ 745.1 |
| PON-1 Protein (ng/mL)                                                  |          | 682.9 $\pm$ 214.0  |

Values are expressed as mean  $\pm$  SD.

Chrysan J. Mohammed

Circulating Lactonase Activity but not Protein Level of PON-1 Predicts Adverse Outcomes in Subjects with Chronic Kidney Disease

Supplementary Data

**Table S3.** Unadjusted and adjusted 8-year hazard ratio for death at 8 years stratified by quartile values for circulating PON activity, protein adjusted activity levels, and PON-1 protein.

| PON Activity (pmol/min/mL)                  |              |                             |                             |                               |
|---------------------------------------------|--------------|-----------------------------|-----------------------------|-------------------------------|
|                                             | Q 4          | Q3                          | Q2                          | Q1                            |
| <i>Range</i>                                | ≥2576        | 2073–2576                   | 1732–2073                   | <1732                         |
| Unadjusted HR                               | 1            | 1.12 (0.64–1.93) <i>p</i> = | 1.66 (0.99–2.78) <i>p</i> = | 1.76 (1.04–2.97) * <i>p</i> = |
| Adjusted HR                                 | 1            | 1.01 (0.57–1.78) <i>p</i> = | 1.24 (0.74–2.09) <i>p</i> = | 1.92 (1.12–3.29) * <i>p</i> = |
| <b>8-year Death (%)</b>                     | 25/62 = 40.3 | 26/62 = 41.9                | 35/61 = 57.4                | 34/62 = 54.8                  |
| Protein Adjusted PON Activity (pmol/min/ng) |              |                             |                             |                               |
|                                             | Q 4          | Q3                          | Q2                          | Q1                            |
| <i>Range</i>                                | ≥8.99        | 6.22–8.99                   | 4.47–6.22                   | <4.47                         |
| Unadjusted HR                               | 1            | 1.01 (0.59–1.75) <i>p</i> = | 1.24 (0.72–2.12) <i>p</i> = | 1.71 (1.03–2.85)              |
| Adjusted HR                                 | 1            | 0.96                        | 0.44                        | * <i>p</i> =0.04              |
| <b>8-year Death (%)</b>                     | 25/62 = 40.3 | 27/61 = 44.3                | 29/61 = 47.5                | 38/61 = 62.3                  |
| PON-1 Protein (ng/mL)                       |              |                             |                             |                               |
|                                             | Q 4          | Q3                          | Q2                          | Q1                            |
| <i>Range</i>                                | ≥472.35      | 333.4–472.35                | 226.85–333.4                | <226.85                       |
| Unadjusted HR                               | 1            | 0.69 (0.42–1.14) <i>p</i> = | 0.80 (0.49–1.30) <i>p</i> = | 0.81 (0.49–1.33) <i>p</i> =   |
| Adjusted HR                                 | 1            | 0.14                        | 0.36                        | 0.40                          |
| <b>8-year Death (%)</b>                     | 35/62 = 56.5 | 0.63 (0.38–1.05) <i>p</i> = | 0.72 (0.43–1.18) <i>p</i> = | 0.89 (0.54–1.46) <i>p</i> =   |
|                                             |              | 0.08                        | 0.19                        | 0.64                          |
| <b>8-year Death (%)</b>                     | 35/62 = 56.5 | 28/62 = 45.2                | 29/61 = 47.5                | 29/62 = 46.8                  |

Model adjusted for traditional risk factors including age, gender, systolic blood pressure, urine protein (log), myocardial infarction, β-blocker, and ACE/ARB. HR indicates hazard ratio; ACE, angiotensin converting enzyme; ARB, angiotensin II receptor blocker. \**p* < 0.05, \*\**p* < 0.01.

Chrysan J. Mohammed

Circulating Lactonase Activity but not Protein Level of PON-1 Predicts Adverse Outcomes in Subjects with Chronic Kidney Disease

Supplementary Data

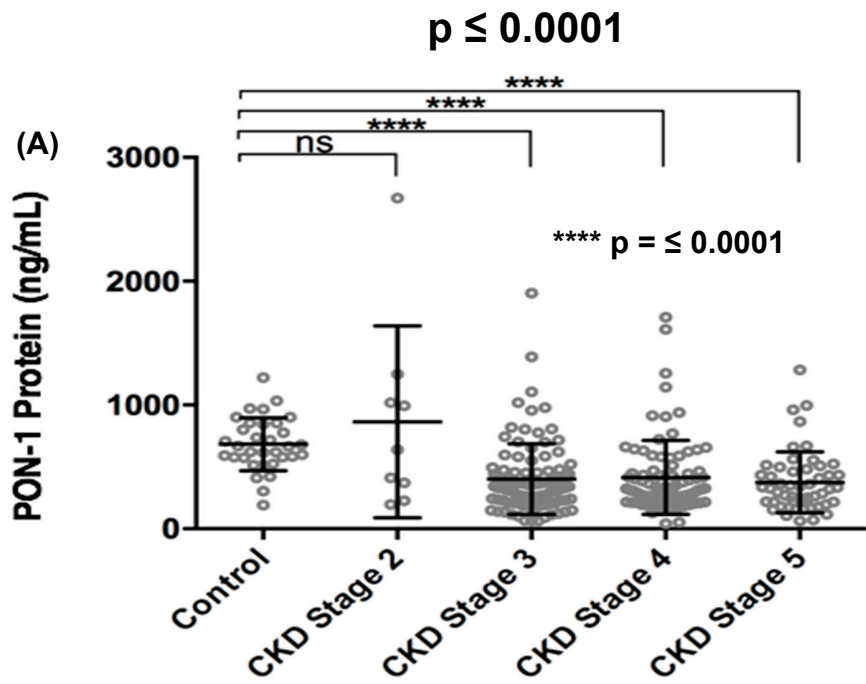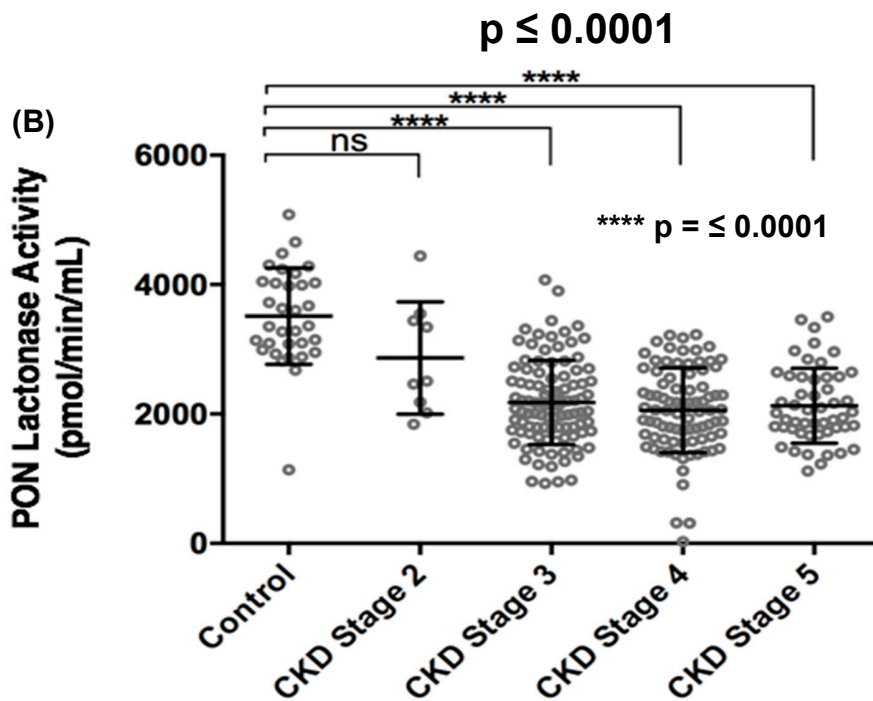

Chrysan J. Mohammed

Circulating Lactonase Activity but not Protein Level of PON-1 Predicts Adverse Outcomes in Subjects with Chronic Kidney Disease

Supplementary Data

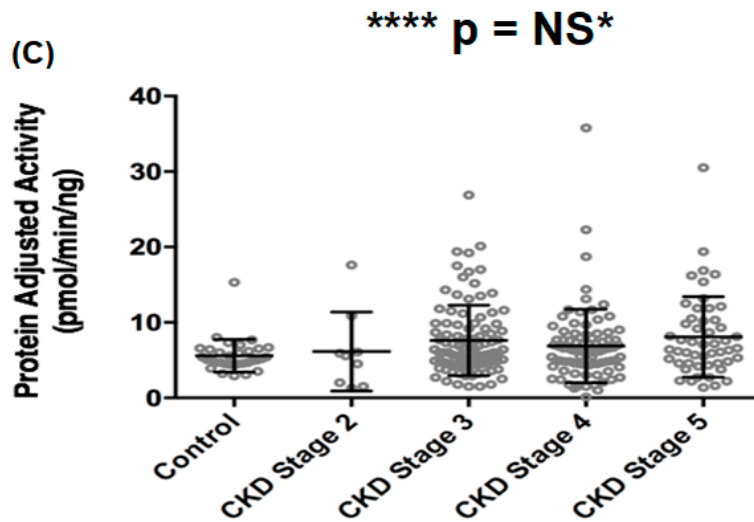

**Figure 1.** (A) Comparison of circulating PON-1 protein levels across CKD stages. NS indicates not significant. (B) Comparison of circulating PON lactonase activity across CKD stages. NS indicates not significant. (C) Comparison of circulating PON protein adjusted lactonase activity across CKD stages. Protein adjusted lactonase activity is the ratio of PON activity and PON-1 protein. NS indicates not significant.

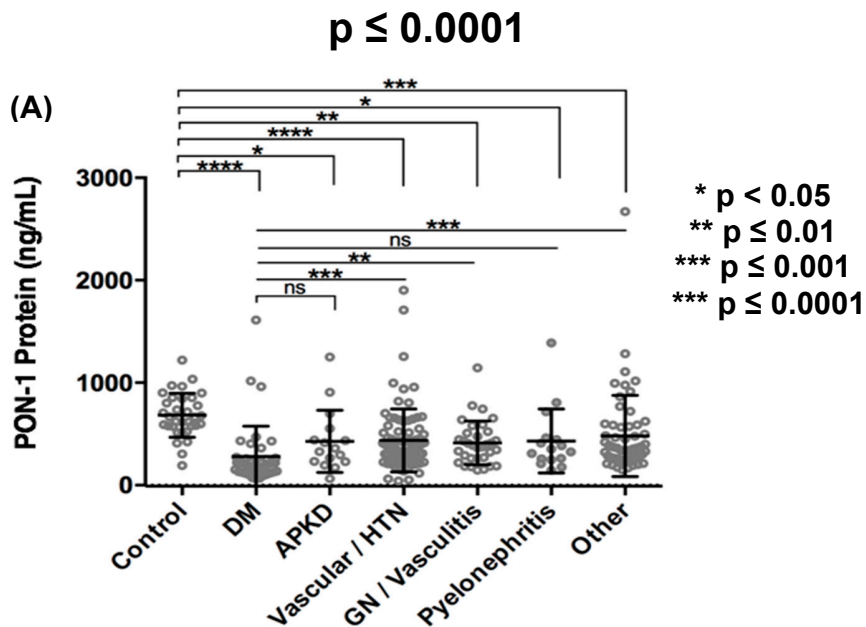

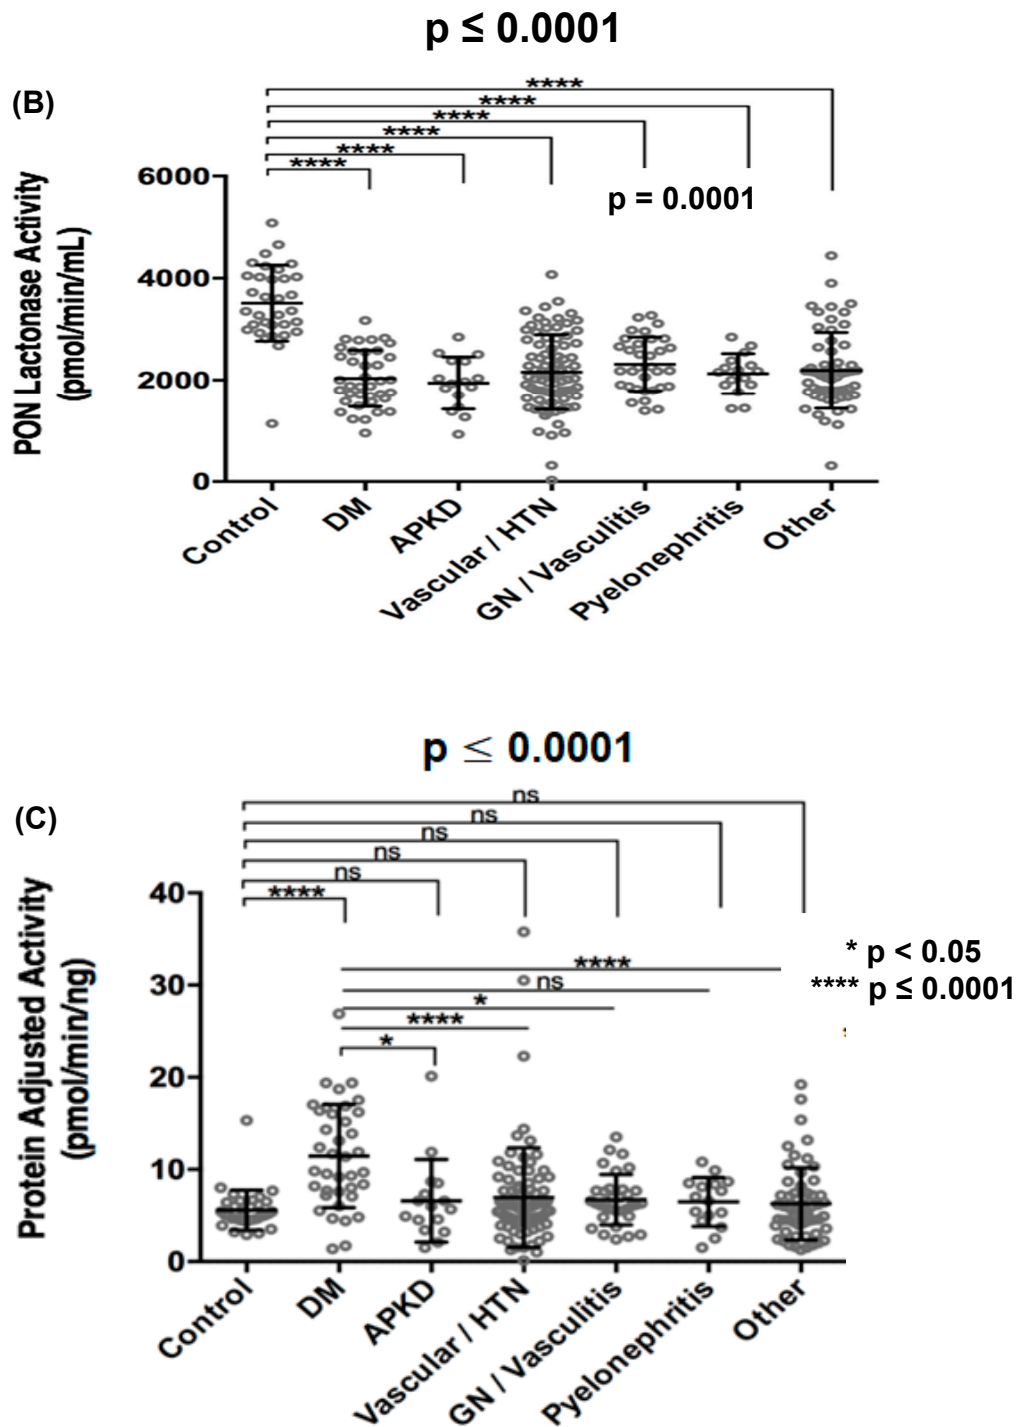

**Figure 2.** (A) Comparison of circulating PON-1 protein levels in CKD etiologies. DM indicates diabetes nephropathy; APKD: adult polycystic kidney disease; vascular/HTN: vascular hypertension; GN/VAS: glomerulonephritis vasculitis; NS: not significant. (B) Comparison of circulating PON lactonase activity in CKD etiologies. DM indicates diabetes nephropathy; APKD: adult polycystic kidney disease; vascular/HTN: vascular hypertension; GN/VAS: glomerulonephritis vasculitis. (C) Comparison of circulating protein adjusted activity in CKD etiologies. DM indicates diabetes nephropathy; APKD: adult polycystic kidney disease; vascular/HTN: vascular hypertension; GN/VAS: glomerulonephritis vasculitis; NS: not significant.

Chrysan J. Mohammed

Circulating Lactonase Activity but not Protein Level of PON-1 Predicts Adverse Outcomes in Subjects with Chronic Kidney Disease

Supplementary Data

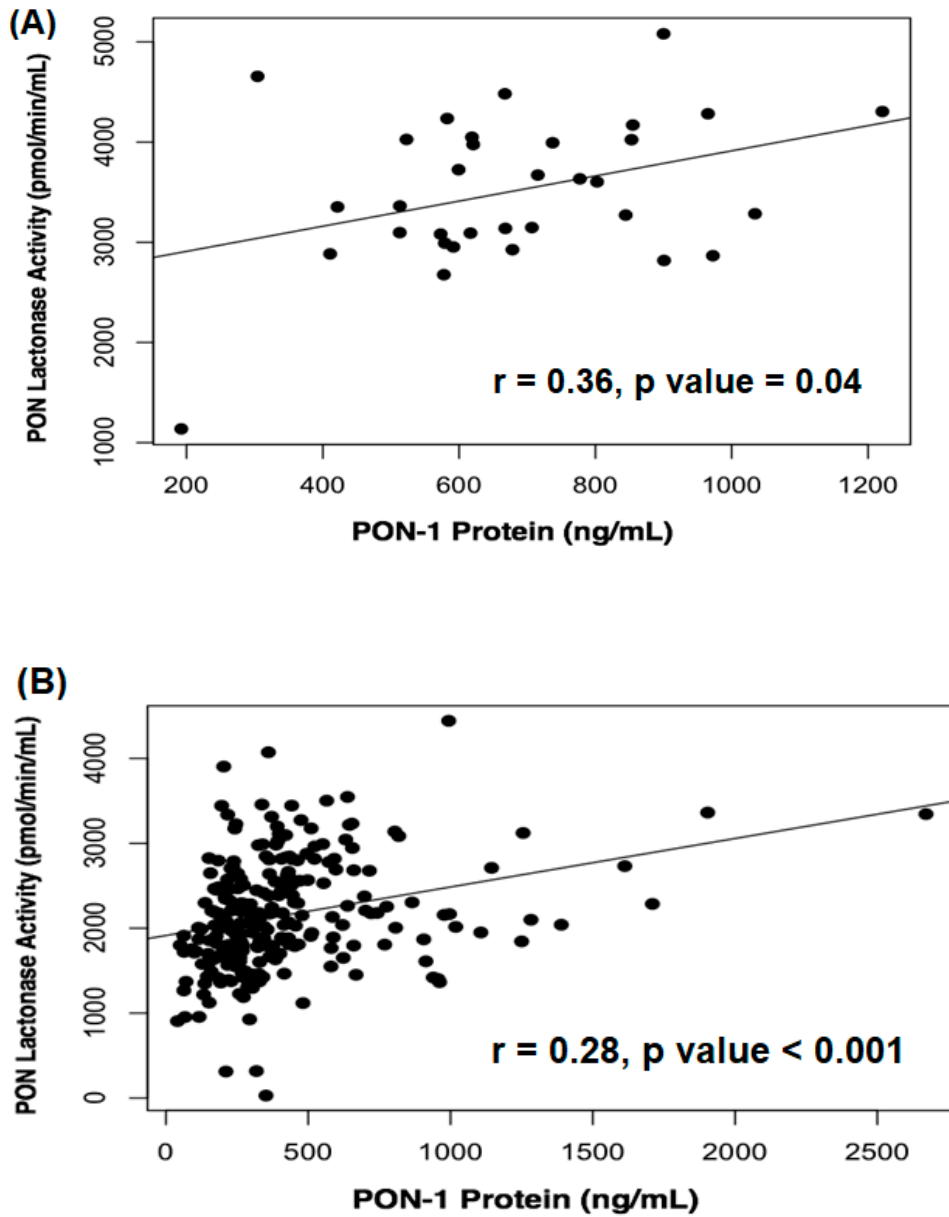

**Figure S3.** (A). Correlation graph showing relationship between PON lactonase activity and PON-1 protein in non-CKD controls. (B) Correlation graph showing relationship between PON lactonase activity and PON-1 protein in patients with chronic kidney disease.



Chrysan J. Mohammed

Circulating Lactonase Activity but not Protein Level of PON-1 Predicts Adverse Outcomes in Subjects with Chronic Kidney Disease

Supplementary Data

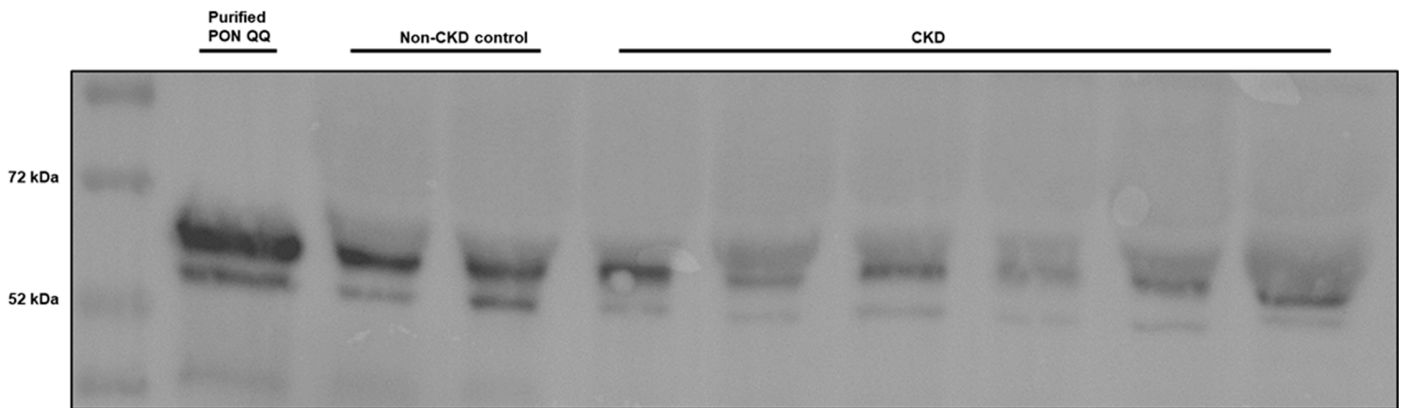

**Figure S4.** Western blot analysis of PON1 expression in non-CKD control subjects and patients with CKD
